# Supplementary material for: In planta expression of hyperthermophilic enzymes as a strategy for accelerated lignocellulosic digestion
Source: PubMed Central journal article supplement (PMC5597601; doi:10.1038/s41598-017-11026-1), 2017-09-13
Supplement: 41598_2017_11026_MOESM1_ESM.pdf [file 41598_2017_11026_MOESM1_ESM.pdf]

# *In planta* expression of hyperthermophilic enzymes as a strategy for accelerated lignocellulosic digestion

Bilal Ahmad Mir<sup>1,2†</sup>, Alexander A Myburg<sup>2</sup>, Eshchar Mizrachi<sup>2</sup>, Don A Cowan<sup>1‡</sup>

<sup>1</sup>Centre for Microbial Ecology and Genomics, Department of Genetics, University of Pretoria, Private Bag X20, Pretoria 0028, South Africa

<sup>2</sup>Department of Genetics, Forestry and Agricultural Biotechnology Institute (FABI), University of Pretoria, Private Bag X20, Pretoria 0028, South Africa

<sup>†</sup>Current address: Department of Botany, School of Life Sciences, University of Kashmir, Kargil Campus, Kargil, Jammu & Kashmir, India

<sup>‡</sup>Corresponding author: [don.cowan@up.ac.za](mailto:don.cowan@up.ac.za)

**S1:** Prediction of cleavage and N-glycosylation sites of recombinant endoglucanase (a) and recombinant xylanase (b). Sub-cellular localization of the recombinant proteins was predicted using TargetP (Emanuelsson et al., 2000, 2007) and N-glycosylation sites were predicted using NetNGlyc (<http://www.cbs.dtu.dk/services/NetNGlyc/>).

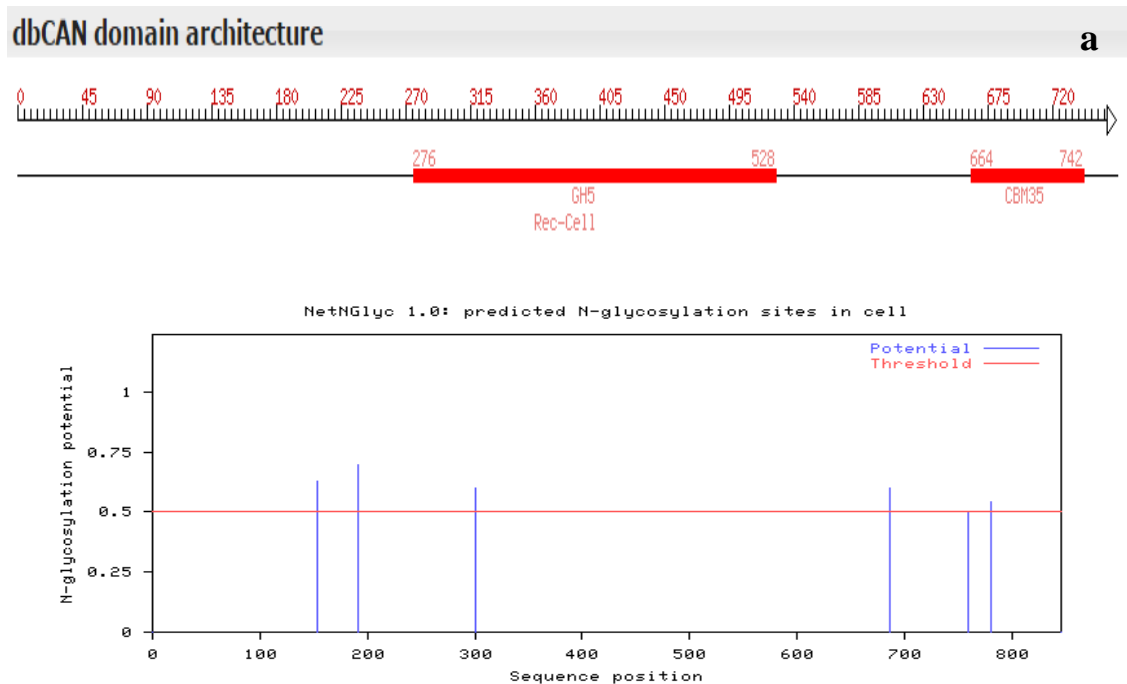

## dbCAN domain architecture

**b**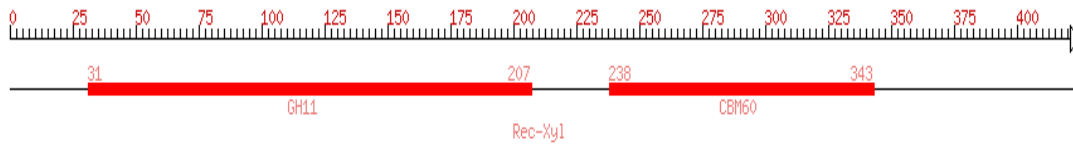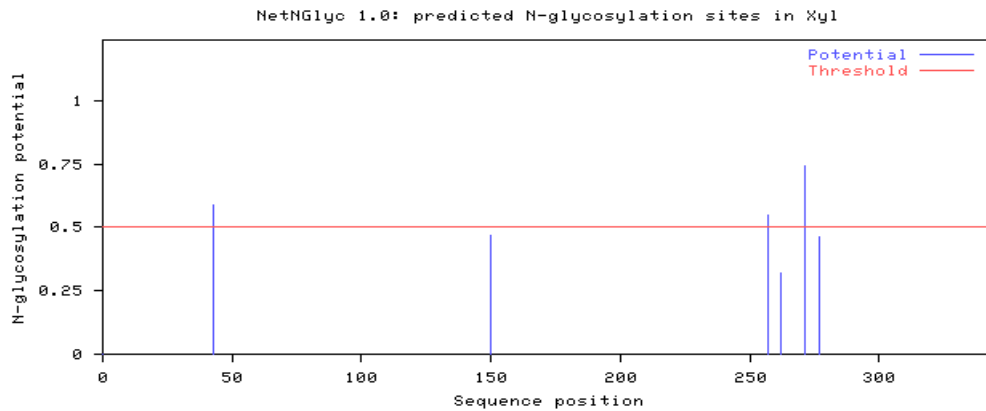

**S2:** Gene cloning of Rec-EG (2756bp), and Rec-Xyn (1146bp) using gene specific primers. M= marker ladders. PCR for EG gene was performed with the following conditions: 30s at 98°C; 30 cycles as follows: 10 s at 98°C; 40 s at 60°C; 1 min at 72°C; 5 min at 72°C. PCR for Xyn was performed with the following conditions: 30s at 98°C; 30 cycles as follows: 10 s at 98°C; 30 s at 60°C; 40s at 72°C; 5 min at 72°C.

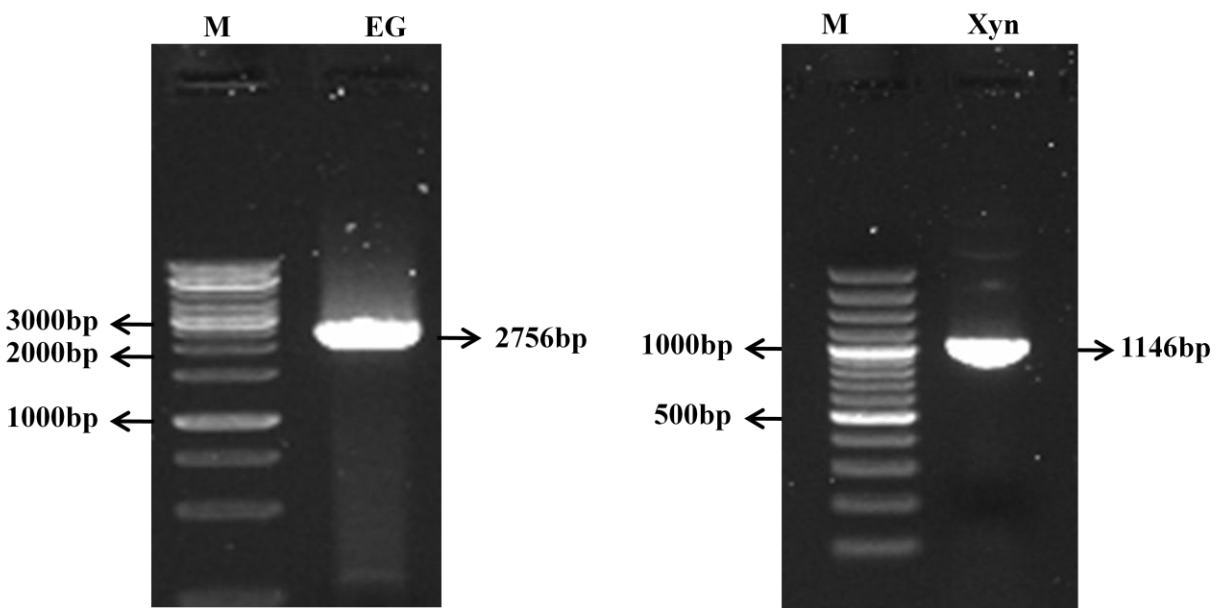

**S3:** Endoglucanase and xylanase activity of protein extracts from C108 and X7 plants expressing Rec-ebi244Opt and Rec-rMxylOpt respectively. A) Observation of clear zone around the protein extracts on 0.1% RBB-xylan (Sigma) plate using 0.1% Congo Red. B-C) Observation of clear zone around the protein extracts on 1% CMC (Sigma) plates using 0.1% Congo Red. The plates were incubated at 75°C for 30 min.

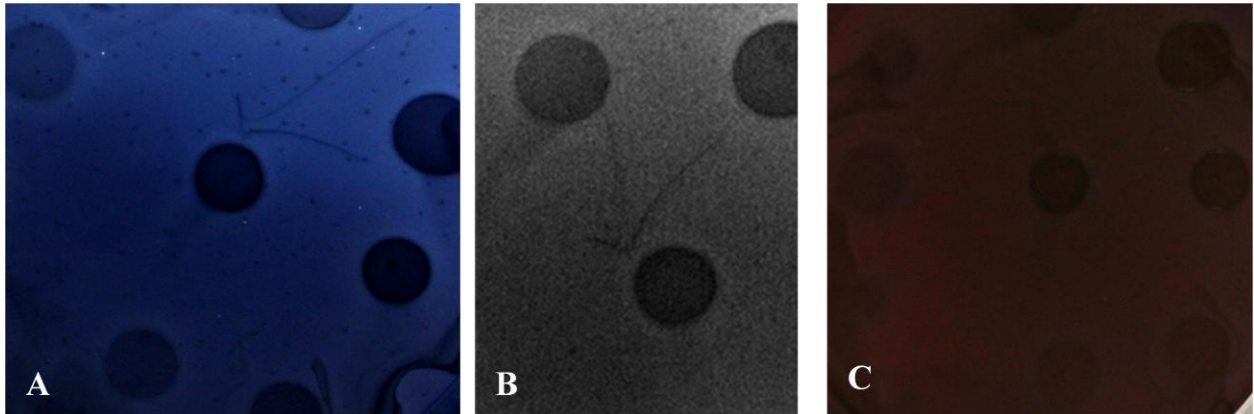

**Table 1: Primers used in this work**

| Primer name            | Sequence (5'-3')                 |
|------------------------|----------------------------------|
| EGFW1                  | CAGCTGGCCACCATGGGATTTGTTCTCTT    |
| EGRev1                 | CAGCTGTTAGCCAGCCCTAGTGATTTCG     |
| XynFW1                 | CAGCTGGCCACCATGGGATTTGTTCT       |
| XynRev1                | CAGCTGTTACGGCGTGTTTCCGTAG        |
| EGFW2                  | CAGCTGGCCACCATGGGATTTGTTCT       |
| EGRev2                 | CAGCTGTTAGCCAGCCCTAGTGAT         |
| XynFW2                 | CAGCTGGCCACCATGGGATTTGTTCT       |
| XynRev2                | CAGCTGTTACGGCGTGTTTCCGTA         |
| EGFW3                  | CAGCTGGCCACCATGGGATTCGTG         |
| EGRev3                 | CAGCTGTTATCCTGCCCTAGTAAT         |
| XynFW3                 | CAGCTGGCCACCATGGGTTTCGT          |
| XynRev3                | CAGCTGTTAAGGTGTATTACCATATCC      |
| EGFW4                  | TGTCAGAAATTAGAGAGTTTATGGTTA      |
| EGRev4                 | TAATTGTAGTGGTAGGTGTCTGAGGTG      |
| EGFW5                  | GATACGGACCAGAAGGTTTTAAGGATA      |
| XynFW4                 | CTTCATCAAGTTCTTCAAGTTCTGGAG      |
| XynRev3                | AAAGGGTTTGTAGTCCATCCATACAAT      |
| RT-PCR/qRT-PCR-Xyn-FW  | CAGACCTCCAGGAGGTCAAGGGGTCCAGTT   |
| RT-PCR/qRT-PCR-Xyn-Rev | AGTACCTCCGGTCCTTCTCTGTTCCGGCATGC |
| RT-PCR/qRT-PCR-EG-FW   | GAATAGGATTGGTTCCATGGGCTCCGTCGGA  |
| RT-PCR/qRT-PCR-EG-Rev  | TATCTCCCCAATTATCTGCGAGCGTTGCGA   |
